# Supplementary material
Source: PubMed Central journal article supplement (PMC6219929)

**Figure 1b**

WB: E2F1

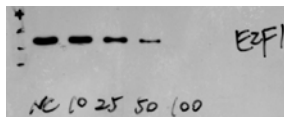

WB: DAPK1

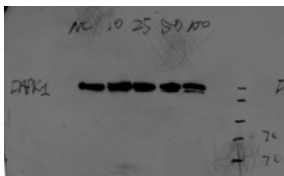

WB: DAPK2

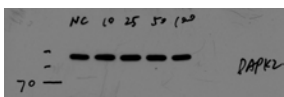

WB: DAPK3

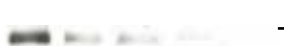

WB: ACTIN

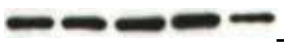**Figure 3a**

WB: Ago1

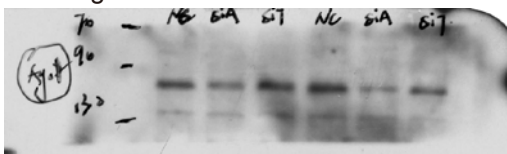

WB: Ago2

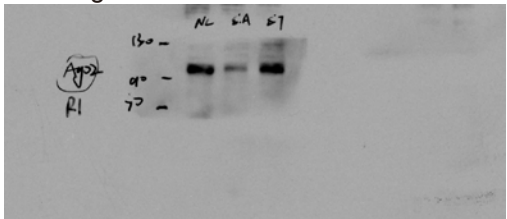

WB: Ago3

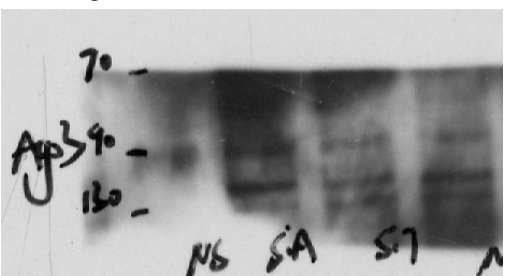

WB: ACTIN

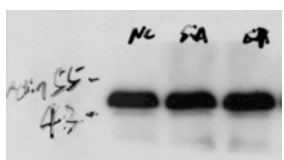**Figure 1c**

WB: E2F1

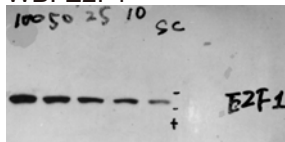

WB: DAPK1

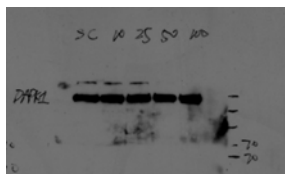

WB: DAPK2

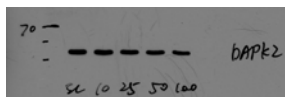

WB: DAPK3

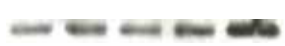

WB: ACTIN

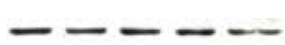**Figure 1b**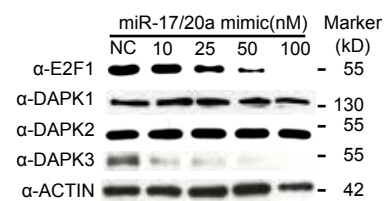**Figure 1c**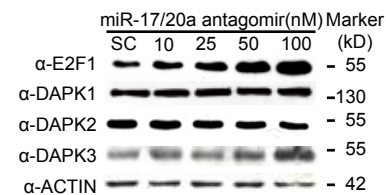

WB: TNRC6A

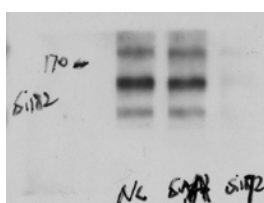

WB: TNRC6B

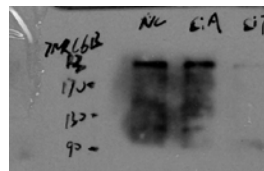

WB: TNRC6C

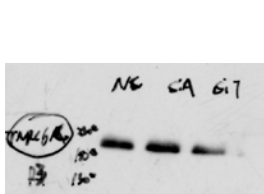

WB: Ago4

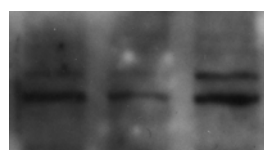**Figure 3a**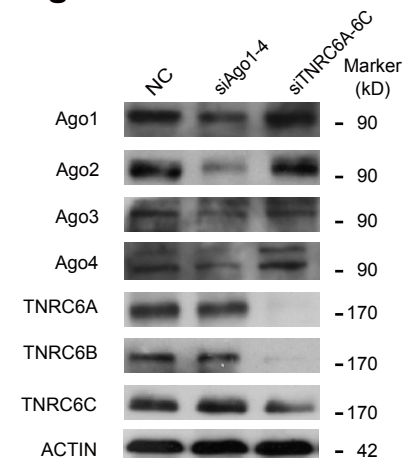



### Figure 5b

WB: Flag

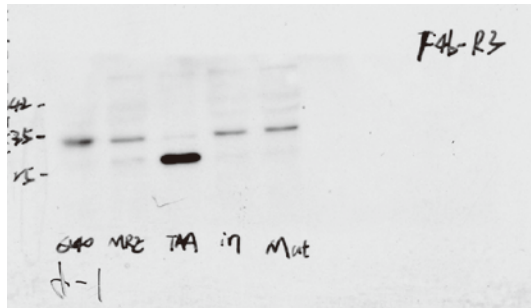

### Figure 5b

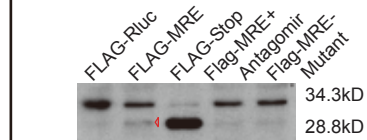

### Figure 5c

WB: Mcherry

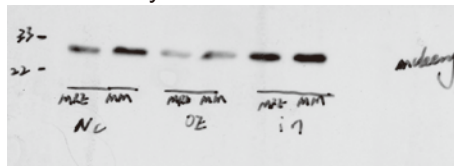

WB: GFP

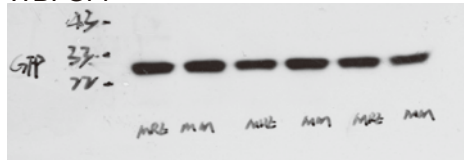

WB: Flag

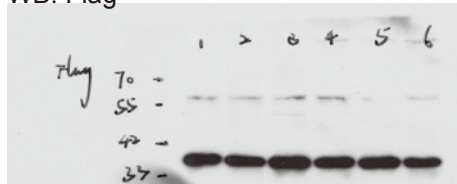

### Figure 5c

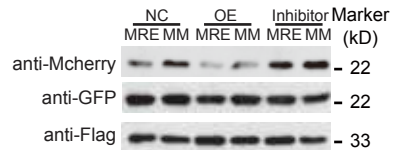

## Suppl Fig. 1a

WB: E2F1

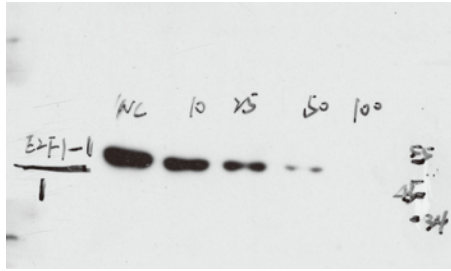

WB: DAPK2

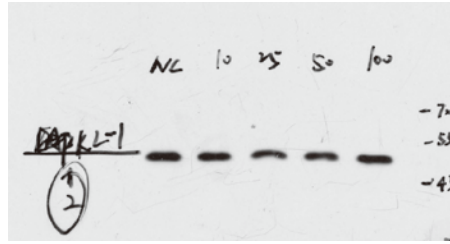

WB: DAPK1

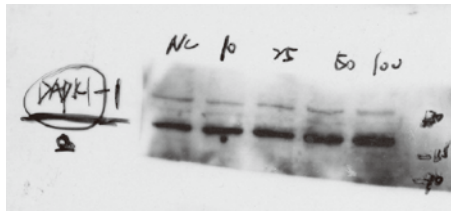

WB: DAPK3

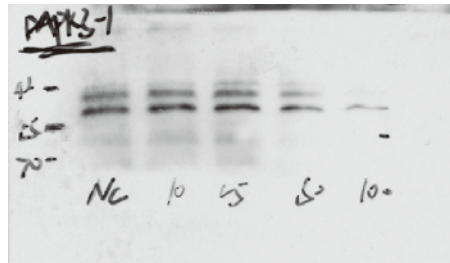

WB: ACTIN

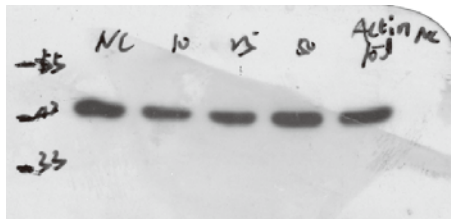

## Suppl Fig. 1a

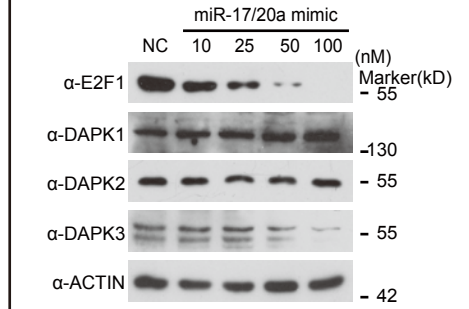

## Suppl Fig. 1b

WB: E2F1

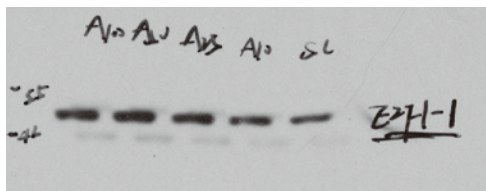

WB: DAPK2

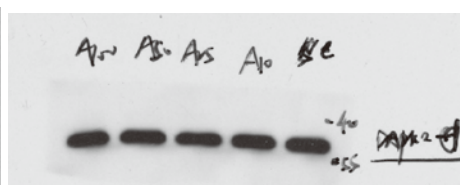

WB: DAPK1

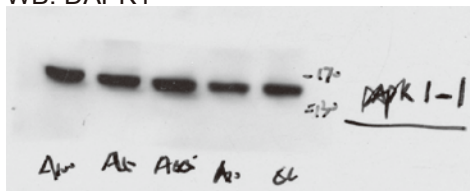

WB: DAPK3

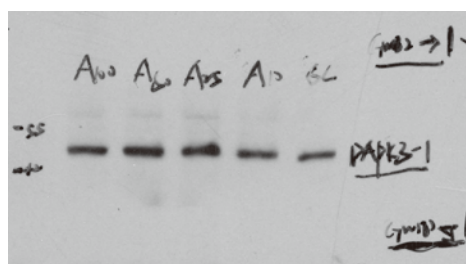

WB: ACTIN

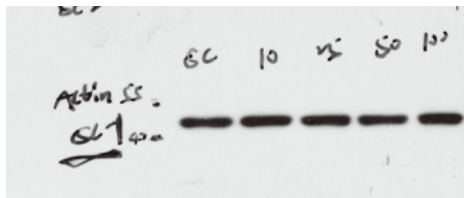

## Suppl Fig. 1b

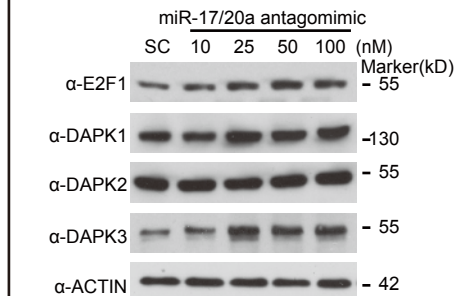



## Suppl Fig. 1n

WB: CD99

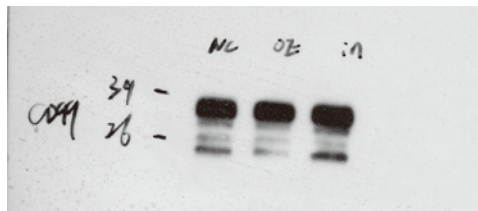

WB: SAFB

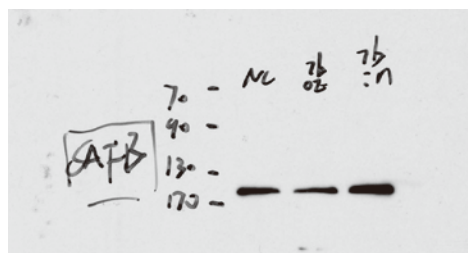

WB: NDRG1

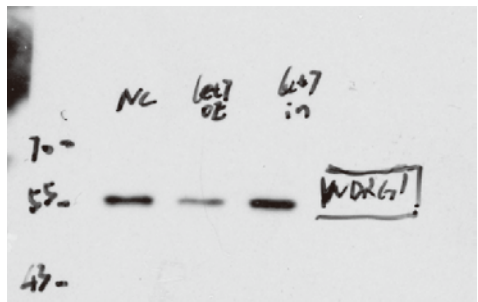

WB: ACTIN

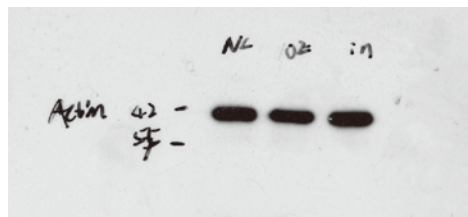

## Suppl Fig. 1n

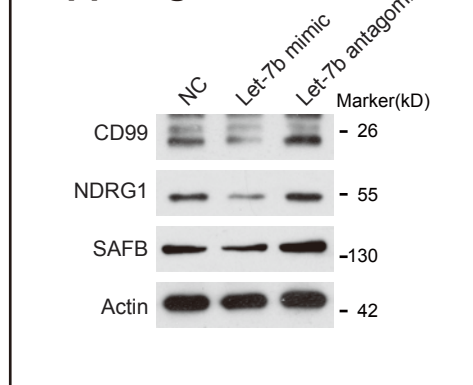

## Suppl Fig. 4a

WB: Ago2

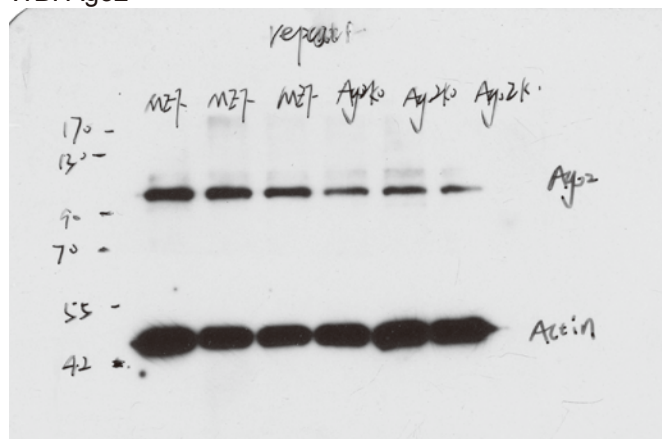

## Suppl Fig. 4b

WB: GW182

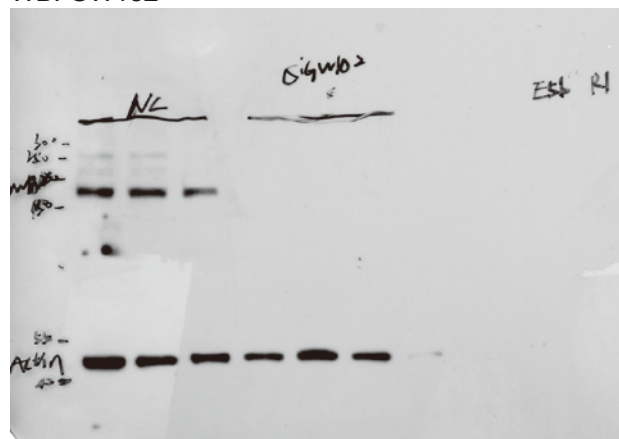

## Suppl Fig. 4a

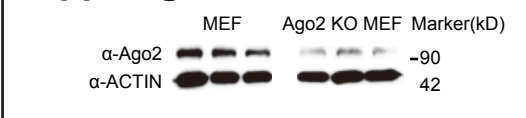

## Suppl Fig. 4b

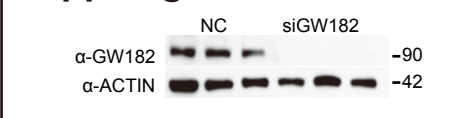





### Suppl Fig. 4e up

WB: Flag

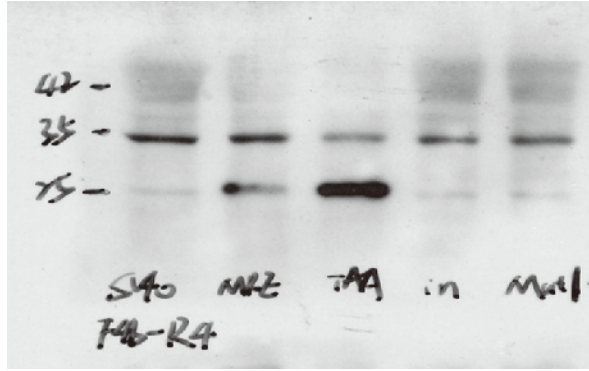

### Suppl Fig. 4e down

WB: Flag

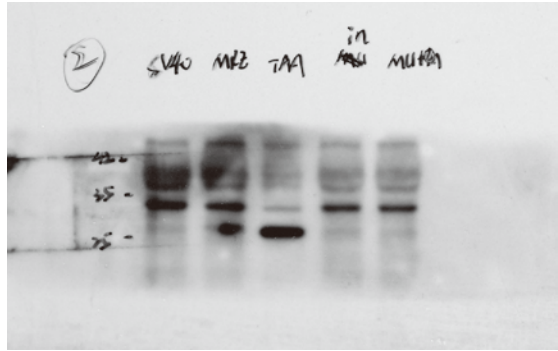

### Suppl Fig. 4f up

WB: Mcherry

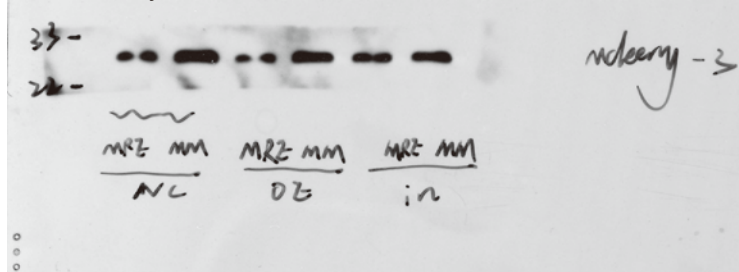

WB: GFP

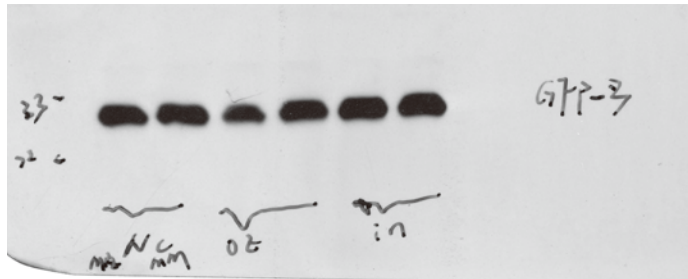

WB: Flag

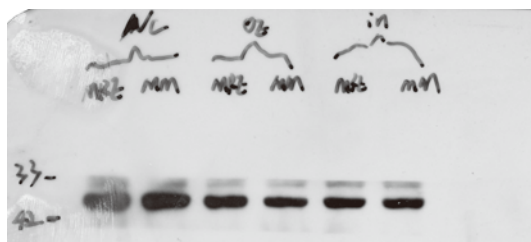

### Suppl Fig. 4e

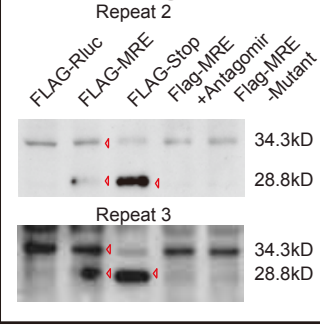

### Suppl Fig. 4f

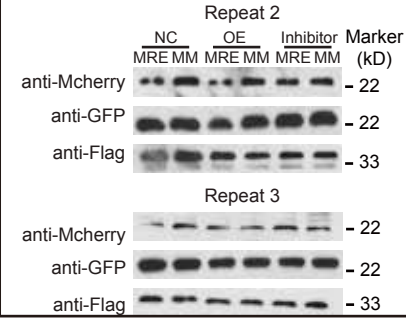

### Suppl Fig. 4f down

WB: Mcherry

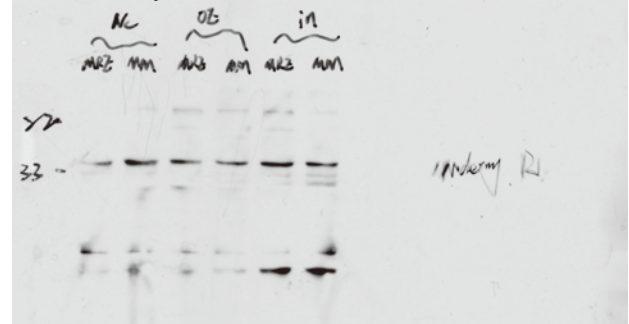

WB: GFP

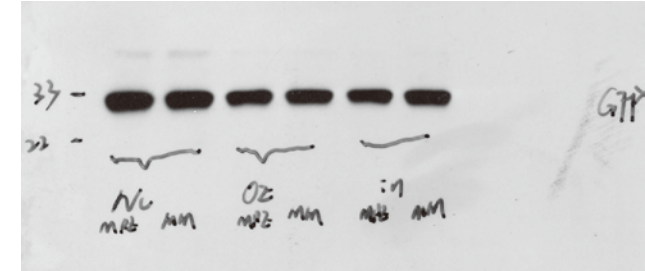

WB: Flag

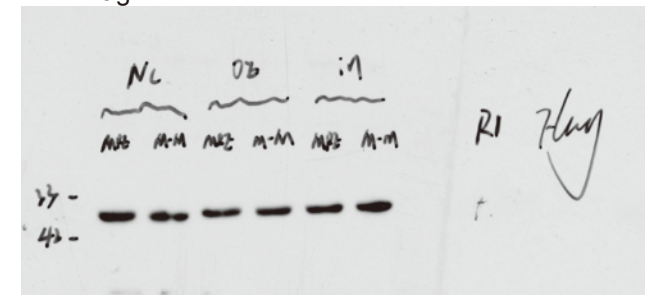

Supplement: NIHMS1505440-supplement-3.pdf [file NIHMS1505440-supplement-3.pdf]
