# Supplementary material
Source: PubMed Central journal article supplement (PMC6219929)
Supplement: NIHMS1505440-supplement-1.pdf [file NIHMS1505440-supplement-1.pdf]

| <b>Supplementary Table 1: List of PCR primers, miRNA and siRNA sequences</b> |                                                                   |
|------------------------------------------------------------------------------|-------------------------------------------------------------------|
| <b>qPCR primers (5'→3'):</b>                                                 |                                                                   |
| DAPK3 F:                                                                     | GTGCCCAACCCACGAATCAA                                              |
| DAPK3 R:                                                                     | AGCGGCTCATAGTTCACAATCTC                                           |
| GAPDH F:                                                                     | CTCACTGCTGGGAGTCCCT                                               |
| GAPDH R:                                                                     | GGTCTACATGGCAACTGTG                                               |
| sichek2 firefly Q F:                                                         | TTCGCTAAGAGCACCTGAT                                               |
| sichek2 firefly Q R:                                                         | GTAATCAGAATGGCGCTGGT                                              |
| sichek2 Renilla Q F:                                                         | TCGTCCATGCTGAGAGTGTC                                              |
| sichek2 Renilla Q R:                                                         | CTAACCTCGCCCTTCTCCTT                                              |
| hActin F:                                                                    | TCCCTGGAGAAGAGCTACGA                                              |
| hActin R:                                                                    | AGCACTGTGTTGGCGTACAG                                              |
| pRL-sv40 F:                                                                  | GAACAAAGGAAACGGATGATAACTG                                         |
| pRL-sv40 R:                                                                  | TGTCGCCATAAATAAGAAGAGGC                                           |
| pGL3 F:                                                                      | CGGATTACCAGGGATTTCACT                                             |
| pGL3 R:                                                                      | AATCTCACGCAGGCAGTTCTA                                             |
| miR-17 RT:                                                                   | GTCGTATCCAGTGCAGGGTCCGAGGTATTCGCACTGGATACGACCTACCTGCACTG          |
| miR-20a RT:                                                                  | GTCGTATCCAGTGCAGGGTCCGAGGTATTCGCACTGGATACGACCTACCTGCACTA          |
| <b>Primers for constructing luciferase reporter (5'→3'):</b>                 |                                                                   |
| MRE+100nt F:                                                                 | CCGCTCGAGTGGTCTCTGGCGGGGAGCTCTTT                                  |
| MRE+100nt R:                                                                 | AAGGAAAAAAGCGGCCGCTCGATCTTGTGCGCGATGCCGAA                         |
| MRE+200nt F:                                                                 | CCGCTCGAGGAGCGGGAGGTGAACATCCTGCC                                  |
| MRE+200nt R:                                                                 | AAGGAAAAAAGCGGCCGCGCTCCACATGTCCGCCCTCCAGGC                        |
| CDS F:                                                                       | AAGAACGAGCAGACTACCTGCACTCTAAGCGCATCGCACACTTTGACCTGAAGCTAATTCTAGGC |
| CDS R:                                                                       | GCCTAGAATTAGCTTCAGGTCAAAGTGTGCGATGCGCTTAGAGTGCAGGTAGTCTGCTCGTTCTT |
| 3' 3nt-mis-UTR F:                                                            | GATCGCTCGAGGATCCTGCACTCTAA                                        |
| 3' 3nt-mis-UTR R:                                                            | TTAGAGTGCAGGATCCTCGAGCGATC                                        |
| 3' 5nt-mis-UTR F:                                                            | GATCGCTCGAGGATCCACCACCTAAGCGC                                     |
| 3' 5nt-mis-UTR R:                                                            | GCGCTTAGAGTGGTGGATCCTCGAGCGATC                                    |
| 3' 7nt-mis-UTR F:                                                            | GATCGCTCGAGGATCCACCTGTCTAAGCGCATCG                                |
| 3' 7nt-mis-UTR R:                                                            | CGAAGCGCTTAGACAGGTGGATCCTCGAGCGATC                                |
| 5' seed F:                                                                   | GCACTCTAAGCGCTTTGGCGGCCGCTG                                       |
| 5' seed R:                                                                   | CAGCGGCCGCCAAAGCGCTTAGAGTGC                                       |
| Stop codon -1nt F:                                                           | CTGAAGAACGAGCAGTTCTAGGCGATC                                       |
| Stop codon -1nt R:                                                           | GATCGCCTAGAACTGCTCGTTCTTCAG                                       |
| 3' 3nt-mis+seed F:                                                           | GATCGCTCGAGGATCCTGCACTCTAAGCGCTTTG                                |
| 3' 3nt-mis+seed R:                                                           | CAAAGCGCTTAGAGTGCAGGATCCTCGAGCGATC                                |
| 3' 5nt-mis+seed F:                                                           | GATCGCTCGAGGATCCACCACCTAAGCGCTTTG                                 |
| 3' 5nt-mis+seed R:                                                           | CAAAGCGCTTAGAGTGGTGGATCCTCGAGCGATC                                |
| 3' 7nt-mis+seed F:                                                           | GATCGCTCGAGGATCCACCTGTCTAAGCGCTTTG                                |
| 3' 7nt-mis+seed R:                                                           | CAAAGCGCTTAGACAGGTGGATCCTCGAGCGATC                                |
| 5' 2nt-mis F:                                                                | GCTACCTGCACTCTAAGCCGATCGCGGCCGCTGGCCGC                            |
| 5' 2nt-mis R:                                                                | GCGGCCAGCGGCCGCGATCGCGAAAGAGTGCAGGTAGCTCG                         |

|                              |                                                                                          |
|------------------------------|------------------------------------------------------------------------------------------|
| 5' 4nt-mis F:                | CGAGCTACCTGCACTCTAACGCGATCGCGGCCGCTGGCCGC                                                |
| 5' 4nt-mis R:                | GCGGCCAGCGGCCGCGATCGCGTTAGAGTGCAGGTAGCTCG                                                |
| 5' 6nt-mis F:                | CGAGCTACCTGCACTCTTTTCGCGATCGCGGCCGCTGGCCGC                                               |
| 5' 6nt-mis R:                | GCGGCCAGCGGCCGCGATCGCGAAAGAGTGCAGGTAGCTCG                                                |
| CDS 5' F:                    | TATGGACTACAAGGACGATGATGACAAGCTACCTGCACTCTAAGCGCATCGGTTCACTACCTGCAC<br>TCTAAGCGCATCGGAGCT |
| CDS 5' R:                    | CCGATGCGCTTAGAGTGCAGGTAGTGAACCGATGCGCTTAGAGTGCAGGTAGCTTGTTCATCATCGT<br>CCTTGTAGTCCA      |
| CDS 3' F:                    | TATGCTACCTGCACTCTAAGCGCATCGCGTTCACTACCTGCACTCTAAGCGCATCGCACACTTTGA<br>CGAGCT             |
| CDS 3' R:                    | CGTCAAAGTGTGCGATGCGCTTAGAGTGCAGGTAGTGAACCGATGCGCTTAGAGTGCAGGTAGCA                        |
| cap CDS 5' NdeI F:           | GGCTAGCCACCATGCATATGACTTCGAAAGTTTAT                                                      |
| cap CDS 5' NdeI R:           | ATAAACTTTTCGAAAGTCATATGCATGGTGGCTAGCC                                                    |
| EMCV CDS 5' NdeI F:          | CGATAATACCATGCATATGACTTCGAAAGTTTA                                                        |
| EMCV CDS 5' NdeI R:          | TAAACTTTTCGAAGTCATATGCATGGTATTATCG                                                       |
| CrPV CDS 5' NdeI F:          | CATTTCAAGATACCATGCATATGACTTCGAAAGTTTATG                                                  |
| CrPV CDS 5' NdeI R:          | CATAAACTTTTCGAAGTCATATGCATGGTATCTTCAAATG                                                 |
| HCV CDS 5' NdeI F:           | GACCGTGCACCATGCATATGAGCACGAATCTTTTCG                                                     |
| HCV CDS 5' NdeI R:           | CGAAAGATTCGTGCTCATATGCATGGTGCACGGTC                                                      |
| pRL SV40 CDS 3' NdeI F:      | GCCGCTCTAGAATTACATATGGAGCTCTTGTTCATTTTTGAG                                               |
| pRL SV40 CDS 3' NdeI R:      | GCCGCTCTAGAATTACATATGTTGTTTCATTTTGAG                                                     |
| cap CDS 5' NdeI/SacI F:      | GCCACCATGCATATGGAGCTCACTTCGAAAGTTTAT                                                     |
| cap CDS 5' NdeI/SacI R:      | ATAAACTTTTCGAAAGTGAGCTCCATATGCATGGTGGC                                                   |
| EMCV CDS 5' NdeI/SacI F:     | CGATAATACCATGCATATGGAGCTCACTTCGAAAGTTTA                                                  |
| EMCV CDS 5' NdeI/SacI R:     | TAAACTTTTCGAAGTGAGCTCCATATGCATGGTATTATCG                                                 |
| CrPV CDS 5' NdeI/SacI F:     | CATTTCAAGATACCATGCATATGGAGCTCACTTCGAAAGTTTATG                                            |
| CrPV CDS 5' NdeI/SacI R:     | CATAAACTTTTCGAAGTGAGCTCCATATGCATGGTATCTTCAAATG                                           |
| HCV CDS 5' NdeI/SacI F:      | GCACCATGCATATGGAGCTCAGCACGAATCTTTTCG                                                     |
| HCV CDS 5' NdeI/SacI R:      | CGAAAGATTCGTGCTGAGCTCCATATGCATGGTGC                                                      |
| pRL SV40 CDS 3' NdeI-SacI F: | AATGAACAACATATGGAGCTCTAATTCTAGAGCGGC                                                     |
| pRL SV40 CDS 3' NdeI-SacI R: | GCCGCTCTAGAATTAGAGCTCCATATGTTGTTTCACT                                                    |
| BAT2 F:                      | GGCCGCACTGCCAGCGAGACAGAGTCACACAGGGCCGCACTGCCAGCGAGACAGAGT                                |
| BAT2 R:                      | ACTCTGTCTCGCTGGCAGTGGCCCTGTGTGACTCTGTCTCGCTGGCAGTGGCC                                    |
| BRPF1 F:                     | AATCACCAACCGCTGACCATCCACACAGAATCACCAACCGCTGACCATC                                        |
| BRPF1 R:                     | GATGGTCAGGCGGTTGGTGATTCTGTGTGGATGGTCAGGCGGTTGGTGATT                                      |
| CD99 F:                      | AACCACCCTAGTTCCTCCCACACACAGAACCACCCTAGTTCCTCC                                            |
| CD99 R:                      | GGAGGAAGTGGGTTCTGTGTGGGAGGAAGTGGGTTGGTT                                                  |
| ERAP2 F:                     | AACCACACACTTCTCAGACCTAACACACACGAACCACACACTTCTCAGACCCAA                                   |
| ERAP2 R:                     | TTAGGTCTGAGAAGTGTGTGGTTCGTGTGTGTTAGGTCTGAGAAGTGTGTGGTT                                   |
| NDRG1 F:                     | AACCACAAAACCTGCTACAACCACACAGAACCACAAAACCTGCTACAACC                                       |
| NDRG1 R:                     | GGTTGTAGCAGGTTTTGTGGTCTGTGTGGTGTGTAGCAGGTTTTGTGGTT                                       |
| SNRPA F:                     | AACCACACTATTTATATCAACAACCTCACACACAGAACCACACTATTTATATCAACAACCTA                           |
| SNRPA R:                     | TGAGGTTGTTGATATAAATAGTGTGGTCTGTGTGTGAGGTTGTTGATATAAATAGTGTGGT                            |

|                                           |                                                              |
|-------------------------------------------|--------------------------------------------------------------|
| PRDM4 F:                                  | AACTACACCCTACCTCCACCACCTTACACACAGAACTACACCCTACCTCCACCACCTTA  |
| PRDM4 R:                                  | TAAGGTGGTGGAGGTAGGGTGTAGTTCTGTGTGTAAGGTGGTGGAGGTAGGGTGTAGTTC |
| SAFB F:                                   | GACCGCGCCGCTACCCCGCACACAGGACCGCGCCGCTACCCCG                  |
| SAFB R:                                   | CGGGGTAGCGGCCGCGGTCTGTGTGCGGGGTAGCGGCCGCGGTC                 |
| Add Flag F:                               | CTAGCCACCATGGATTACAAGGATGACGACGATAAGACTT                     |
| Add Flag R:                               | CGAAGTCTTATCGTCGTCATCCTTGTAATCCATGGTGG                       |
| 1479MRE F:                                | GGACCCAGGATTCTTTTCTACCTGCACTCTAAGCGCATCGTCCAATGCTATTGTTG     |
| 1479MRE R:                                | CAACAATAGCATTTGGACGATGCGCTTAGAGTGCAGGTAGGAAAGAATCCTGGGTCC    |
| TAA F:                                    | GGACCCAGGATTCTTTTGATAAGATACATTGATGATCCAATGCTATTGTTG          |
| TAA R:                                    | CAACAATAGCATTTGGATCATCAATGTATCTTATCAAAGAATCCTGGGTCC          |
| <b>miRNA and siRNA sequences (5'→3'):</b> |                                                              |
| miR-17 F:                                 | CAAAGUGCUUACAGUGCAGGUAG                                      |
| miR-17 R:                                 | CUACCUGCACUGUAAGCACUUUG                                      |
| miR-17 MT F:                              | CAAAGUGCUUACAGUGCAGGUAG                                      |
| miR-17 MT R:                              | CUACCUGCACUGUAAGCACUUUG                                      |
| miR-20a F:                                | UAAAGUGCUUUAUAGUGCAGGUAG                                     |
| miR-20a R:                                | CUACCUGCACUUAAGCACUUUA                                       |
| miR-20a MT F:                             | UAAAGUGCUUUAUAGUGCAGGUAG                                     |
| miR-20a MT R:                             | CUACCUGCACUUAAGCACUUUA                                       |
| siGW182 F:                                | GCCUAAUCUCCGUGCUC AATT                                       |
| siGW182 R:                                | TTUUGAGCACGGAGAUUAGGC                                        |
| <b>SiAGO1-4</b>                           |                                                              |
| 1(Ago1) F:                                | CAUGAGGUACACCCUGUGGG                                         |
| 1(Ago1) R:                                | CCCACAGGGGUGUACCUCAUG                                        |
| 2(Ago2) F:                                | UGGAAAAUGAUGCUGAAUUAU                                        |
| 2(Ago2) R:                                | AAUAUUCAGCAUCAUUUCCA                                         |
| 3(Ago3) F:                                | AAAGAACAUGACAGUGCUGAA                                        |
| 3(Ago3) R:                                | UUCAGCACUGUCAUGUUCUUU                                        |
| 4(Ago4) F:                                | CUGACUUACCAGCUGUGUCAC                                        |
| 4(Ago4) R:                                | GUGACACAGCUGGUAAGUCAG                                        |
| 5(Ago1) F:                                | GAUCGAAUCUUUAAGGUCUTT                                        |
| 5(Ago1) R:                                | AGACCUUAAAAGAUUCGAUCTT                                       |
| 6(Ago2) F:                                | GCAAGAAGAGAUUAGCAAATT                                        |
| 6(Ago2) R:                                | UUUGC UAAUCUCUUCUUGCTT                                       |
| 7(Ago3) F:                                | CAGUCGUCCUUCACACUAUTT                                        |
| 7(Ago3) R:                                | AUAGUGUGAAGGACGACUGTT                                        |
| 8(Ago4) F:                                | GGCACUACAGUGGAUAGUATT                                        |
| 8(Ago4) R:                                | UACUAUCCACUGUAGUGCCTT                                        |
| <b>siTNRC6A-C</b>                         |                                                              |
| 1(6A) F:                                  | CUCUGGUUGGGACAGACUCC                                         |
| 1(6A) R:                                  | GGAGUCUGUCCCAACCAGAG                                         |
| 2(6B) F:                                  | AAGAACUCAGGGGGCUGGGGA                                        |
| 2(6B) R:                                  | UCCCCAGCCCCUGAGUUCUU                                         |

|          |                        |
|----------|------------------------|
| 3(6C) F: | AAAUUGAUGAUGGUACCUCAG  |
| 3(6C) R: | CUGAGGUACCAUCAAAUUU    |
| 4(6A) F: | CCCUAUGACUUUAUGAACATT  |
| 4(6A) R: | UGUUCAUAAAAGUCAUAGGGAA |
| 5(6B) F: | CUCCCAUUGUAGAUACUGATT  |
| 5(6B) R: | UCAGUAUCUACAAUGGGAGAT  |
| 6(6C) F: | GGUACGAUUUAAUCCAGAATT  |
| 6(6C) R: | UUCUGGAUUAAAUCGUACCGG  |
